# Supplementary material for: Synergistic effect of molybdenum nitride and carbon nanotubes on electrocatalysis for dye-sensitized solar cells
Source: Royal Society of Chemistry journal article supplement (doi:10.1039/c2jm34878k), 2012-01-01
Supplement: c2jm34878k.pdf [file c2jm34878k.pdf]

Electronic Supplementary Material (ESI) for  
**Synergistic effect of molybdenum nitride and carbon nanotubes on  
electrocatalysis for dye-sensitized solar cells**

J. Song, G. R. Li,\* F. Y. Xiong, and X. P. Gao\*

Institute of New Energy Material Chemistry, Tianjin Key Laboratory of Metal and  
Molecule Based Material Chemistry, Nankai University, Tianjin 300071, China

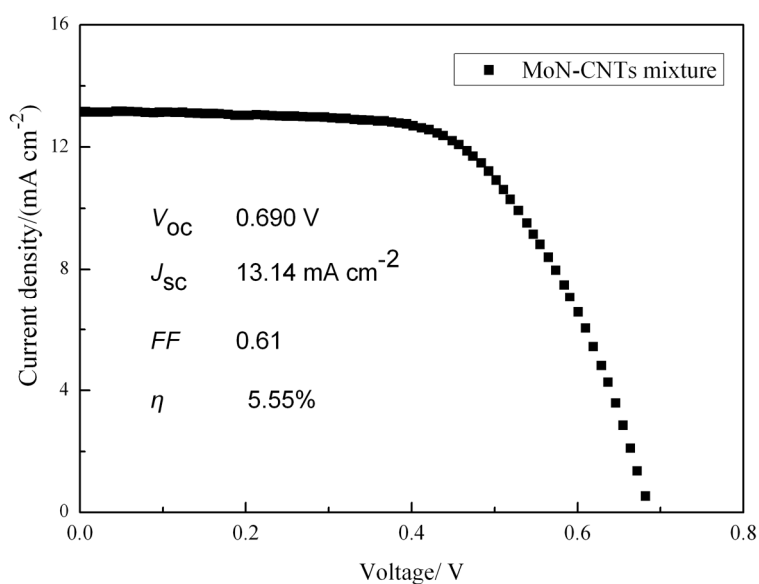

**Fig. 1s** Characteristic  $J$ - $V$  curves of DSSC using MoN-CNTs mixture as counter electrodes measured under simulated sunlight at  $100 \text{ mW cm}^{-2}$  (AM 1.5). The mixture is obtained by mixing the as-prepared MoN nanoparticles (10 wt%) and nitrated-CNTs in a mortar.
